# Supplementary material for: Effects of Hydrolysable Tannin with or without Condensed Tannin on Alfalfa Silage Fermentation Characteristics and In Vitro Ruminal Methane Production, Fermentation Patterns, and Microbiota
Source: MDPI journal article supplement (doi:10.3390/ani11071967), 2021-06-30
Supplement: s1 [file s1]

Table S1

Primers of microbes used for real-time PCR assay.

| Target species                   | Primer sequence (5')                                            | GeneBank accession no. | Annealing temperature<br>( °C) | Size (bp) | Efficiency<br>(%) |
|----------------------------------|-----------------------------------------------------------------|------------------------|--------------------------------|-----------|-------------------|
| Total bacteria                   | F: CGGCAACGAGCGCAACCC<br>R: CCATTGTAGCACGTGTGTAGCC              | AY548787.1             | 60                             | 147       | 103.2             |
| Total anaerobic fungi            | F: GAGGAAGTAAAAGTCGTAACAAGGTTTC<br>R: CAAATTCACAAAGGGTAGGATGATT | GQ355327.1             | 57.5                           | 120       | 90.2              |
| Total protozoa                   | F: GCTTTCGWTGGTAGTGTATT<br>R: CTTGCCCTCYAATCGTWCT               | HM212038.1             | 59                             | 234       | 97.5              |
| Total methanogens                | F: TTCGGTGGATCDCARAGRGC<br>R: GBARGTCGWAWCCGTAGAATCC            | GQ339873.1             | 60                             | 160       | 102.5             |
| <i>Ruminococcus albus</i>        | F: CCCTAAAAGCAGTCTTAGTTTCG<br>R: CCTCCTTGCGGTTAGAACA            | CP002403.1             | 60                             | 176       | 90.1              |
| <i>Ruminococcus flavefaciens</i> | F: ATTGTCCCAGTTCAGATTGC<br>R: GGCGTCCTCATTGCTGTTAG              | AB849343.1             | 60                             | 173       | 90.8              |
| <i>Butyrivibrio fibrisolvens</i> | F: ACCGCATAAGCGCACGGA<br>R: CGGGTCCATCTTGTAACGATAAAT            | HQ404372.1             | 61                             | 65        | 99.1              |
| <i>Fibrobacter succinogenes</i>  | F: GTTCGGAATTACTGGGCGTAAA<br>R: CGCCTGCCCCCTGAACATC             | AB275512.1             | 61                             | 121       | 94.8              |
| <i>Pevotella ruminicola</i>      | F: GAAAGTCGGATTAATGCTCTATGTTG<br>R: CATCCTATAGCGGTAAACCTTTGG    | LT975683.1             | 58.5                           | 74        | 94.6              |
| <i>Ruminobacter amylophilus</i>  | F: CTGGGGAGCTGCCTGAATG<br>R: GCATCTGAATGCGACTGGTTG              | MH708240.1             | 60                             | 102       | 93.7              |
